# Supplementary material
Source: publisher figshare collection journal article supplement (https://acs.figshare.com/ndownloader/files/4564507)
Supplement: Supplementary file 1 [file 4564507]

Supplementary figures:

Figure S1.

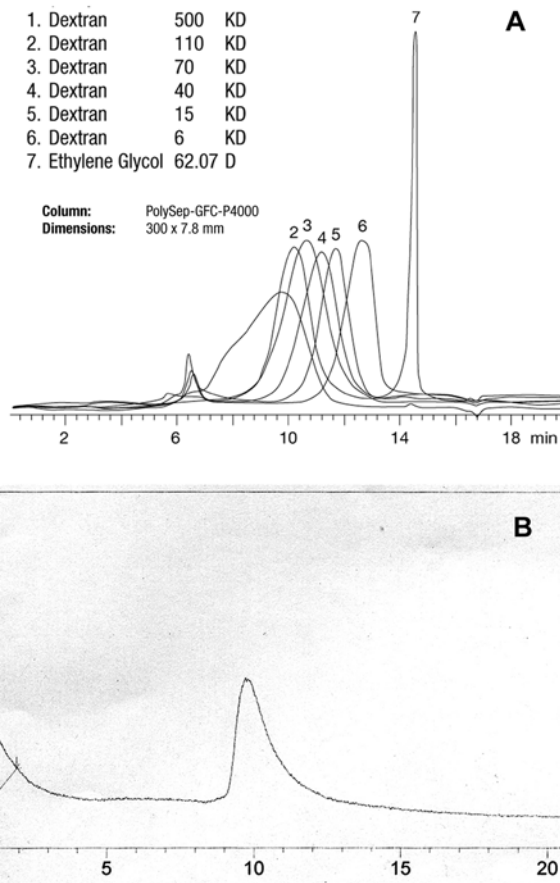

Figure S2.

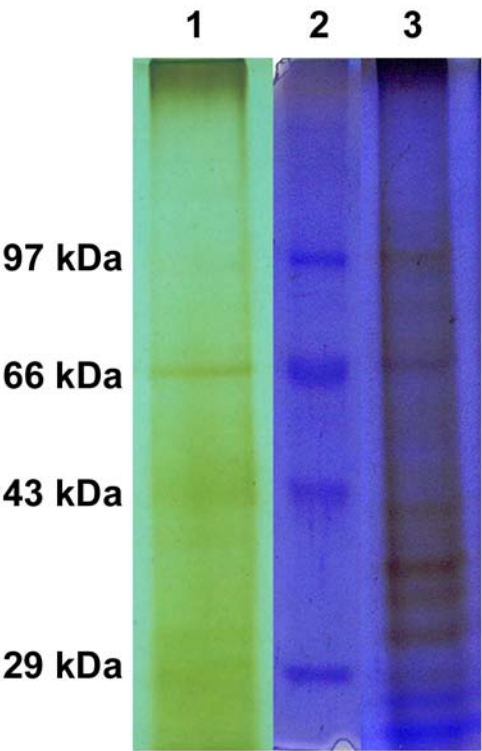

Figure S3.

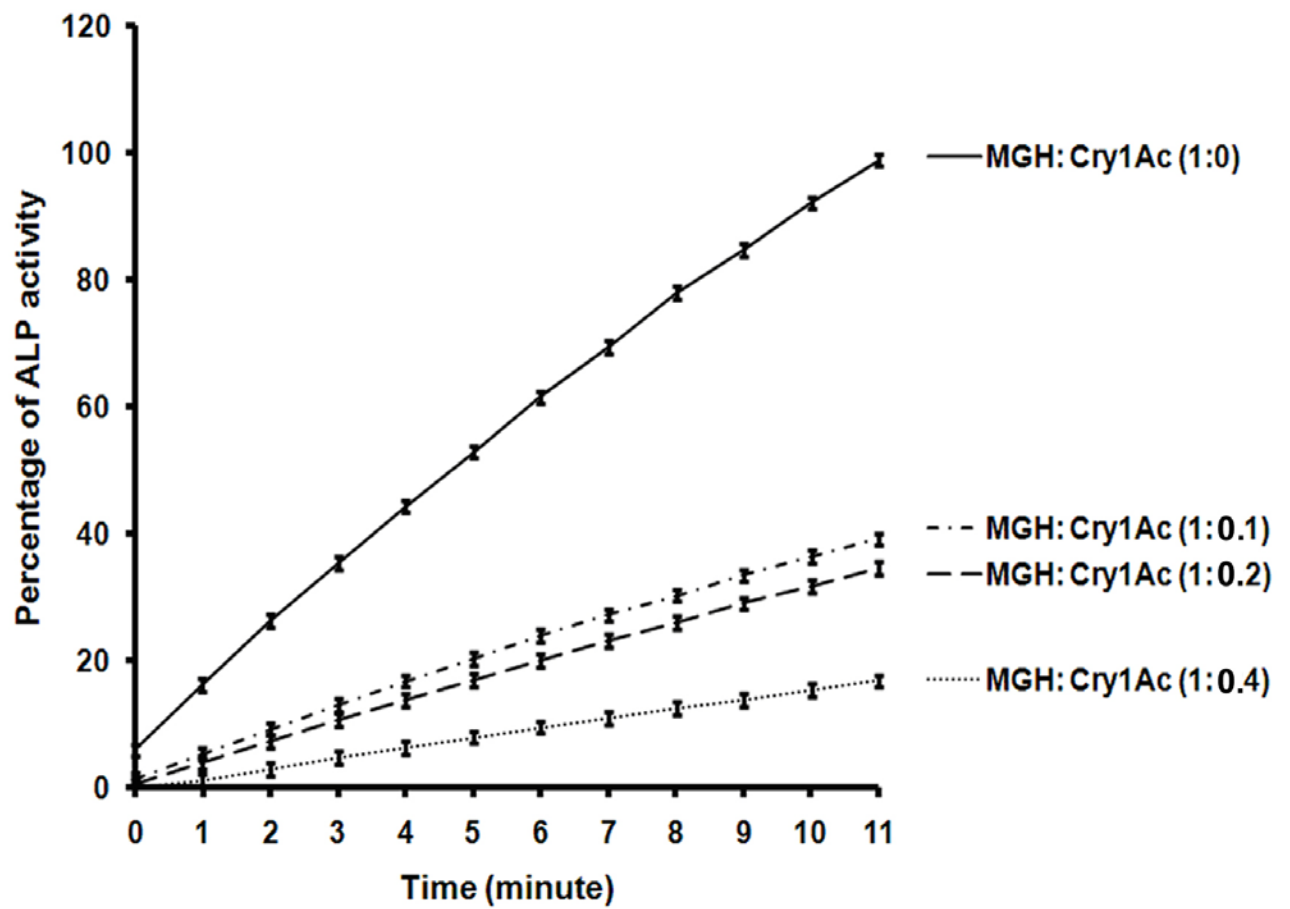

#### SUPPLEMENTARY FIGURE CAPTIONS

Figure S1. HPLC gel filtration chromatograms. (A) Gel filtration chromatogram of the known molecular weight markers provided by the vendor. (B) HPLC chromatogram of the purified HaALP protein.

Figure S2. Glycospecific and coomassie-stained profile of total BBMV protein. Lane 1, the glycoprotein-specific staining of *Helicoverpa armigera* total BBMV protein; lane 2, Coomassie-stained molecular weight marker; lane 3, Coomassie-stained total proteins after glycoprotein-specific staining.

Figure S3 .Kinetic study of alkaline phosphatase activity in midgut homogenate (MGH). Percentage of alkaline phosphatase activity in MGH depicted after incubation with different concentration of Cry1Ac and without Cry1Ac.
